# Supplementary material
Source: Springer Nature journal article supplement (https://www.springermedizin.de/resource/supplementary/13075_2011_3279_MOESM3_ESM.pdf/9694152)

**A**  $\alpha$  citBiP-derived peptide Abs

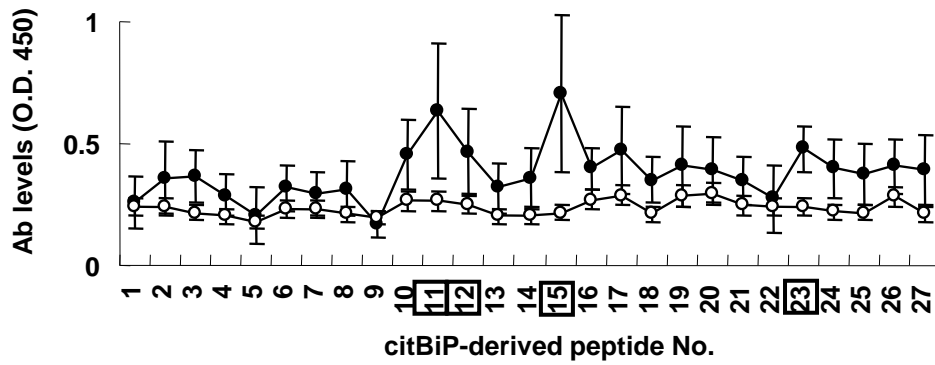

**B**

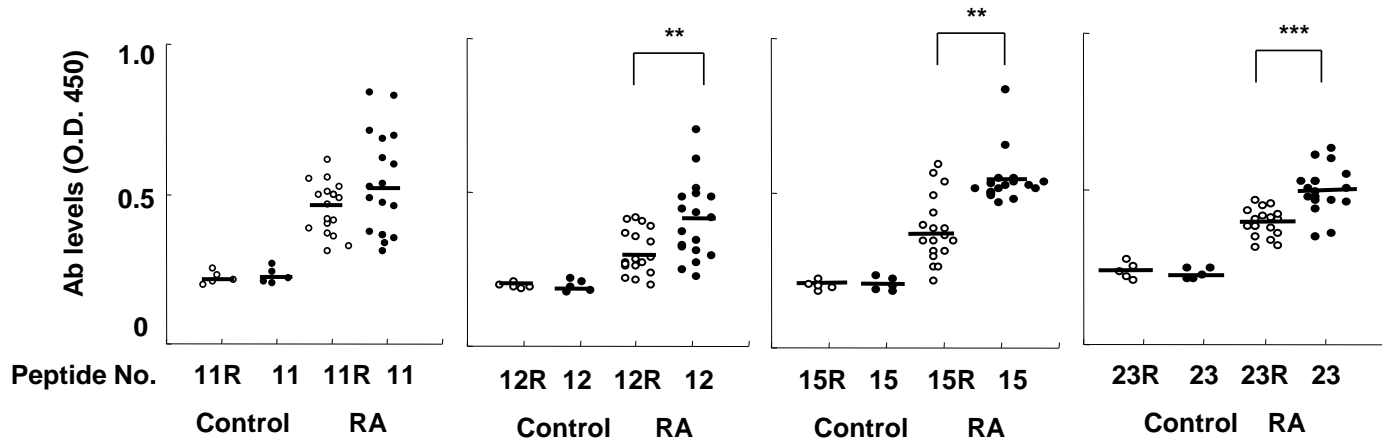

**C**

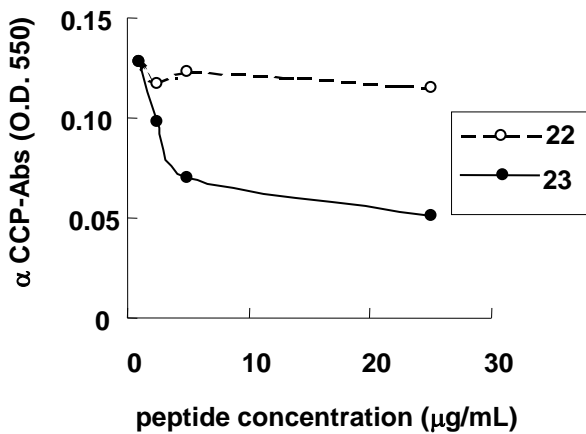

Supplement: MOESM3 [file 9694152]
